# Supplementary material for: Cyclodextrin catalysis of the pH-independent hydrolyses of acetals †
Source: Royal Society of Chemistry journal article supplement (doi:10.1039/b006568o), 2001-01-01
Supplement: b006568o.doc [file b006568o.doc]

# Supplementary data

**Cyclodextrin catalysis of the pH-independent hydrolyses of acetals**

**Doug T. H. Chou, Jiang Zhu, Xicai Huang and Andrew J. Bennet**[[1]](#footnote-2)

Department of Chemistry, Simon Fraser University, 8888 University Drive, Burnaby, British Columbia, V5A 1S6, Canada

**Supplementary Data**

***Table S1*** *Observed rate constants (103  kobs s–1) for -CD-catalysed hydrolysis of 2-(4-nitrophenyl)tetrahydropyran as a function of pH, T = 50.0 C,  = 0.2 M (KCl).*a

| [CD] (mM) | pH = 3.50b | pH = 5.00c | pH = 9.50d | pH = 10.60d | pH = 11.70e |
| --- | --- | --- | --- | --- | --- |
| 0.00 | 1.62  0.01 | 1.13  0.05 | 1.10  0.01 | 1.10  0.01 | 1.13  0.01 |
| 0.30 | 1.78  0.06 | 1.20  0.05 | 1.19  0.01 | 1.19  0.02 | NDf |
| 0.60 | 1.77  0.02 | 1.26  0.06 | 1.29  0.01 | 1.28  0.01 | NDf |
| 0.90 | 1.81  0.05 | 1.30  0.07 | 1.38  0.01 | 1.37  0.02 | 1.38  0.02 |
| 1.50 | 1.98  0.01 | 1.50  0.08 | 1.54  0.01 | 1.55  0.01 | 1.55  0.02 |
| 2.10 | 2.05  0.13 | 1.61  0.05 | 1.70  0.02 | 1.69  0.03 | NDf |
| 2.70 | 2.25  0.02 | 1.71  0.02 | 1.85  0.02 | 1.84  0.01 | 1.79  0.01 |
| 3.75 | 2.38  0.05 | 1.91  0.02 | 2.04  0.01 | 2.05  0.02 | NDf |
| 4.50 | 2.53  0.09 | 1.94  0.13 | 2.20  0.03 | 2.16  0.02 | 2.18  0.01 |
| 7.50 | 2.88  0.09 | 2.27  0.08 | 2.61  0.03 | 2.55  0.04 | 2.61  0.01 |
| 11.25 | 3.13  0.11 | 2.65  0.03 | 2.95  0.01 | 2.93  0.06 | 2.95  0.03 |
| 14.85 | 3.20  0.04 | 2.82  0.02 | 3.18  0.01 | 3.13  0.07 | 3.18  0.02 |

**Table** **S1 continued**

| [CD] (mM) | pH = 12.18e | pH = 12.40e | pH = 12.70e | pH = 12.88e | pH = 13.00e |
| --- | --- | --- | --- | --- | --- |
| 0.00 | 1.12  0.01 | 1.14  0.01 | 1.13  0.01 | 1.09  0.03 | 1.13  0.01 |
| 0.30 | NDf | 1.21  0.01 | 1.18  0.01 | NDf | 1.15  0.01 |
| 0.60 | NDf | 1.25  0.01 | 1.23  0.01 | NDf | 1.19  0.01 |
| 0.90 | 1.35  0.01 | 1.31  0.01 | 1.29  0.01 | 1.23  0.01 | 1.21  0.01 |
| 1.50 | 1.50  0.01 | 1.44  0.01 | 1.37  0.01 | 1.29  0.01 | 1.26  0.01 |
| 2.10 | NDf | 1.55  0.01 | 1.46  0.01 | NDf | 1.32  0.01 |
| 2.70 | 1.74  0.01 | 1.67  0.01 | 1.55  0.01 | 1.41  0.01 | 1.37  0.01 |
| 3.75 | NDf | 1.84  0.01 | 1.69  0.01 | NDf | 1.47  0.01 |
| 4.50 | 2.07  0.03 | 1.95  0.01 | 1.75  0.01 | 1.60  0.02 | 1.52  0.01 |
| 7.50 | 2.53  0.02 | 2.26  0.05 | 2.04  0.01 | 1.83  0.01 | 1.70  0.01 |
| 11.25 | 2.85  0.02 | 2.58  0.02 | 2.29  0.02 | 2.03  0.03 | 1.88  0.01 |
| 14.85 | 3.07  0.01 | 2.79  0.01 | 2.47  0.01 | 2.17  0.01 | 2.00  0.01 |

*a* Mean value of three runs; quoted error = n-1.

*b* Formate buffer; [buffer]total = 10.0 mM.

*c* Acetate buffer; [buffer]total = 10.0 mM.

*d* Carbonate buffer; [buffer]total = 10.0 mM.

*e* Calculated as 14.0 + log10[OH–].

*f* ND: not determined

***Table S2*** *Observed rate constants (103  kobs s–1) for -CD-catalysed hydrolysis of 2-(4-nitrophenyl)tetrahydropyran as a function of pH, T = 50.0 C,  = 0.2 M (KCl).*a

| [CD] (mM) | pH = 3.50b | pH = 5.00c | pH = 9.50d | pH = 10.60d | pH = 11.70e |
| --- | --- | --- | --- | --- | --- |
| 0.00 | 1.61  0.05 | 1.18  0.02 | 1.090  0.002 | 1.100  0.006 | 1.13  0.01 |
| 0.30 | 1.57  0.03 | 1.15  0.04 | 1.06  0.06 | 1.060  0.001 | NDf |
| 0.60 | 1.56  0.03 | 1.16  0.02 | 1.050  0.002 | 1.050  0.006 | NDf |
| 0.90 | 1.52  0.02 | 1.17  0.08 | 1.030  0.002 | 1.030  0.006 | 1.053  0.006 |
| 1.50 | 1.47  0.03 | 1.11  0.01 | 0.997  0.003 | 0.999  0.001 | 1.010  0.006 |
| 2.10 | 1.40  0.04 | 1.05  0.02 | 0.97  0.01 | 0.973  0.005 | NDf |
| 2.70 | 1.33  0.01 | 1.00  0.05 | 0.939  0.003 | 0.937  0.009 | 0.956  0.004 |
| 3.75 | 1.33  0.06 | 0.97  0.07 | 0.899  0.006 | 0.906  0.008 | NDf |
| 4.50 | 1.24  0.01 | 0.98  0.02 | 0.891  0.004 | 0.893  0.004 | 0.90  0.01 |
| 7.50 | 1.12  0.03 | 0.88  0.06 | 0.845  0.006 | 0.845  0.009 | 0.843  0.004 |
| 11.25 | 1.02  0.03 | 0.87  0.02 | 0.815  0.002 | 0.812  0.005 | 0.791  0.005 |
| 14.85 | 0.99  0.02 | 0.83  0.03 | 0.789  0.003 | 0.786  0.001 | 0.768  0.001 |

Table S2 continued

| [CD] (mM) | pH = 12.18*e* | pH = 12.40*e* | pH = 12.70*e* | pH = 12.88*e* | pH = 13.00*e* |
| --- | --- | --- | --- | --- | --- |
| 0.00 | 1.133  0.006 | 1.133  0.006 | 1.113  0.002 | 1.113  0.006 | 1.127  0.006 |
| 0.30 | ND*f* | 1.100  0.005 | 1.090  0.002 | ND*f* | 1.090  0.001 |
| 0.60 | ND*f* | 1.057  0.006 | 1.06  0.01 | ND*f* | 1.067  0.006 |
| 0.90 | 1.05  0.01 | 1.040  0.005 | 1.037  0.006 | 1.030  0.0**XX** | 1.037  0.006 |
| 1.50 | 0.996  0.006 | 1.003  0.006 | 0.987  0.006 | 0.963  0.007 | 0.984  0.002 |
| 2.10 | ND*f* | 0.968  0.005 | 0.952  0.005 | ND*f* | 0.940  0.003 |
| 2.70 | 0.940  0.007 | 0.921  0.005 | 0.904  0.007 | 0.890  0.004 | 0.892  0.004 |
| 3.75 | ND*f* | 0.877  0.002 | 0.850  0.002 | ND*f* | 0.835  0.005 |
| 4.50 | 0.879  0.006 | 0.847  0.005 | 0.824  0.004 | 0.794  0.003 | 0.803  0.002 |
| 7.50 | 0.810  0.006 | 0.771  0.007 | 0.727  0.006 | 0.687  0.003 | 0.701  0.004 |
| 11.25 | 0.763  0.006 | 0.717  0.001 | 0.648  0.002 | 0.597  0.005 | 0.610  0.001 |
| 14.85 | 0.715  0.012 | 0.678  0.001 | 0.597  0.002 | 0.542  0.001 | 0.553  0.008 |

*a* Mean value of three runs; quoted error = n-1.

*b* Formate buffer; [buffer]total = 10.0 mM.

*c* Acetate buffer; [buffer]total = 10.0 mM.

*d* Carbonate buffer; [buffer]total = 10.0 mM.

*e* Calculated as 14.0 + log10[OH–].

*f* ND: not determined

**Table S3** Observed rate constants (103  *k*obs s–1) for -CD acid-catalysed hydrolysis of 2-(4-nitrophenyl)tetrahydropyran as a function of pH, T = 50.0 C,  = 0.2 M (KCl).*a*

| [CD] (mM) | pH = 3.50*b* | pH = 5.00*c* | pH = 9.50*d* | pH = 10.60*d* |
| --- | --- | --- | --- | --- |
| 0.00 | 1.53  0.07 | 1.00  0.05 | 1.04  0.02 | 1.040  0.006 |
| 0.60 | 1.42  0.05 | 0.97  0.04 | 1.03  0.02 | 1.00  0.01 |
| 1.50 | 1.32  0.04 | 0.95  0.02 | 0.99  0.01 | 0.96  0.07 |
| 2.70 | 1.24  0.06 | 0.92  0.02 | 0.95  0.01 | 0.95  0.01 |
| 4.50 | 1.19  0.04 | 0.86  0.03 | 0.91  0.02 | 0.90  0.01 |
| 7.50 | 1.08  0.02 | 0.78  0.02 | 0.85  0.02 | 0.853  0.009 |
| 11.25 | 0.95  0.04 | 0.75  0.03 | 0.817  0.005 | 0.808  0.006 |
| 14.85 | 0.92  0.04 | 0.75  0.02 | 0.798  0.009 | 0.779  0.005 |

*a* Mean value of three runs; quoted error = n-1.

*b* Formate buffer; [buffer]total = 10.0 mM.

*c* Acetate buffer; [buffer]total = 10.0 mM.

*d* Carbonate buffer; [buffer]total = 10.0 mM.

**Table S4** Observed rate constants (103  *k*obs s–1) for -CD-catalysed hydrolysis of 2-(4-nitrophenyl)tetrahydropyran as a function of pH, T = 50.0 C,  = 0.2 M (KCl).*a*

| [CD] (mM) | pH = 3.50*b* | pH = 5.00*c* | pH = 9.50*d* | pH = 10.60*d* |
| --- | --- | --- | --- | --- |
| 0.00 | 1.51  0.04 | 1.05  0.04 | 1.070  0.005 | 1.06  0.01 |
| 0.60 | 1.36  0.04 | 0.97  0.01 | 1.04  0.02 | 1.04  0.09 |
| 1.50 | 1.37  0.05 | 1.01  0.04 | 1.030  0.005 | 1.03  0.01 |
| 2.70 | 1.31  0.03 | 0.95  0.02 | 0.99  0.02 | 0.99  0.01 |
| 4.50 | 1.26  0.07 | 0.88  0.04 | 0.943  0.007 | 0.93  0.01 |
| 7.50 | 1.27  0.02 | 0.85  0.05 | 0.89  0.01 | 0.884  0.006 |
| 11.25 | 1.24  0.11 | 0.83  0.03 | 0.860  0.004 | 0.847  0.003 |
| 14.85 | 1.17  0.07 | 0.81  0.04 | 0.808  0.007 | 0.810  0.003 |

*a* Mean value of three runs; quoted error = n-1.

*b* Formate buffer; [buffer]total = 10.0 mM.

*c* Acetate buffer; [buffer]total = 10.0 mM.

*d* Carbonate buffer; [buffer]total = 10.0 mM.

***Table S5*** *Observed rate constants (104 kobs s–1) for -CD-catalysed hydrolysis of 2-(4-cyanophenyl)tetrahydropyran as a function of pH, T = 50.0 C,  = 0.2 M (KCl).*a

| [CD] (mM) | pH = 3.50b | pH = 5.00c | pH = 9.50d | pH = 10.60d |
| --- | --- | --- | --- | --- |
| 0.00 | 7.93  0.05 | 1.59  0.03 | 1.23  0.01 | 1.22  0.01 |
| 0.90 | 7.99  0.11 | 1.77  0.04 | 1.34  0.01 | 1.33  0.01 |
| 1.50 | 8.07  0.07 | 1.82  0.05 | 1.41  0.01 | 1.40  0.01 |
| 2.70 | 8.07  0.07 | 1.93  0.03 | 1.52  0.01 | 1.51  0.01 |
| 4.50 | 8.14  0.09 | 2.15  0.01 | 1.68  0.01 | 1.66  0.01 |
| 7.50 | 8.11  0.05 | 2.35  0.06 | 1.89  0.01 | 1.85  0.01 |
| 11.25 | 7.90  0.26 | 2.43  0.04 | 2.08  0.01 | 2.04  0.01 |
| 14.85 | 7.63  0.14 | 2.51  0.01 | 2.21  0.02 | 2.17  0.01 |

**Table** **S5 continued**

| [CD] (mM) | pH = 11.70e | pH = 12.18e | pH = 12.40e |
| --- | --- | --- | --- |
| 0.00 | 1.25  0.01 | 1.23  0.01 | 1.27  0.01 |
| 0.90 | 1.34  0.01 | 1.32  0.01 | 1.32  0.01 |
| 1.50 | 1.39  0.01 | 1.38  0.01 | 1.37 0.02 |
| 2.70 | 1.49  0.01 | 1.48  0.01 | 1.44  0.01 |
| 4.50 | 1.68  0.01 | 1.59  0.02 | 1.56  0.01 |
| 7.50 | 1.83  0.01 | 1.75  0.01 | 1.71  0.01 |
| 11.25 | 2.00  0.01 | 1.90  0.02 | 1.80  0.02 |
| 14.85 | 2.12  0.01 | 2.02  0.01 | 1.90  0.01 |

*a* Mean value of three runs; quoted error = n-1.

*b* Formate buffer; [buffer]total = 10.0 mM.

*c* Acetate buffer; [buffer]total = 10.0 mM.

*d* Carbonate buffer; [buffer]total = 10.0 mM.

*e* Calculated as 14.0 + log10[OH–].

***Table S6*** *Observed rate constants (104 kobs s–1) for -CD-catalysed hydrolysis of 2-(4-cyanophenyl)tetrahydropyran as a function of pH, T = 50.0 C,  = 0.2 M (KCl).*a

| [CD] (mM) | pH = 3.50b | pH = 5.00c | pH = 9.50d | pH = 10.60d |
| --- | --- | --- | --- | --- |
| 0.00 | 7.93  0.08 | 1.74  0.04 | 1.25  0.01 | 1.25  0.01 |
| 0.90 | 7.03  0.07 | 1.50  0.02 | 1.13  0.01 | 1.13  0.01 |
| 1.50 | 6.47  0.04 | 1.38  0.03 | 1.07  0.01 | 1.06  0.01 |
| 2.70 | 5.78  0.16 | 1.25  0.01 | 0.95  0.01 | 0.95  0.01 |
| 4.50 | 4.85  0.05 | 1.05  0.02 | 0.82  0.01 | 0.83  0.01 |
| 7.50 | 3.85  0.07 | 0.88  0.04 | 0.70  0.01 | 0.71  0.01 |
| 11.25 | 3.21  0.02 | 0.85  0.02 | 0.61  0.01 | 0.59  0.01 |
| 14.85 | 2.78  0.04 | 0.68  0.03 | 0.54  0.01 | 0.56  0.01 |

**Table** **S6 continued**

| [CD] (mM) | pH = 11.70e | pH = 12.18e | pH = 12.40e |
| --- | --- | --- | --- |
| 0.00 | 1.24  0.01 | 1.23  0.01 | 1.25  0.01 |
| 0.90 | 1.13  0.01 | 1.13  0.01 | 1.17  0.01 |
| 1.50 | 1.05  0.01 | 1.04  0.01 | 1.10  0.01 |
| 2.70 | 0.95  0.01 | 0.95  0.01 | 0.99  0.01 |
| 4.50 | 0.80  0.01 | 0.84  0.01 | 0.87  0.01 |
| 7.50 | 0.68  0.01 | 0.71  0.01 | 0.72  0.01 |
| 11.25 | 0.60  0.01 | 0.59  0.01 | 0.61  0.01 |
| 14.85 | 0.54  0.01 | 0.53  0.01 | 0.55  0.01 |

*a* Mean value of three runs; quoted error = n-1.

*b* Formate buffer; [buffer]total = 10.0 mM.

*c* Acetate buffer; [buffer]total = 10.0 mM.

*d* Carbonate buffer; [buffer]total = 10.0 mM.

*e* Calculated as 14.0 + log10[OH–].

**Table S7: Observed rate constants (*k*obs) for the hydrolysis of 2-deoxy--d-*g*lucopyranosyl quinolinium tetrafluoroborate as a function of pH at 55.0 C ( = 2.0, NaClO4).*a***

| Buffer*b* | pH | 103*k*obs (s–1) |
| --- | --- | --- |
| Acetate | 4.39 | 2.01 ± 0.03 |
| MES | 6.46 | 1.99 ± 0.02 |
| MOPS | 7.55 | 2.00 ± 0.01 |
| TAPS | 8.54 | 1.98 ± 0.01 |
| CHES | 9.70 | 1.97 ± 0.02 |
| CAPS | 10.82 | 2.06 ± 0.02 |

** Mean value of three runs; quoted error = n-1.

*b* [Buffer]total = 0.01M

**Table S8:** Observed rate constants (*k*obs) for the hydrolysis of 2-deoxy--d-*g*lucopyranosyl quinolinium tetrafluoroborate as a function of temperature ( = 1.0, NaClO4).***a,b***

| Temperature (C) | 104kobs (s–1) |
| --- | --- |
| 25.0 | 0.314 ± 0.001 |
| 35.0 | 1.58 ± 0.01 |
| 45.0 | 6.92 ± 0.03 |
| 55.0 | 27.0 ± 0.20 |
| 65.0 | 94.4 ± 0.15 |

*a* Buffer is 0.01M phosphate buffer (1:1 NaH2PO4:Na2HPO4).

*b* Mean value of three runs; quoted error = n-1.

**Table S9:** Observed rate constants (*k*obs) for the hydrolysis of 2-deoxy--d-*g*lucopyranosyl isoquinolinium tetrafluoroborate as a function of temperature ( = 1.0, NaClO4).***a,b***

| Temperature (C) | 105kobs (s–1) |
| --- | --- |
| 55.0 | 0.647 ± 0.049 |
| 65.0 | 3.22 ± 0.02 |
| 75.0 | 13.2 ± 0.1 |
| 85.0 | 44.0 ± 0.8 |
| 95.0 | 151 ± 3 |

*a* Buffer is 0.01M phosphate buffer (1:1 NaH2PO4:Na2HPO4).

*b* Mean value of three runs; quoted error = n-1.

**Table S10:** Observed rate constants (104  kobs s–1) for the hydrolysis of (2-deoxyglucopyranosyl)pyridinium tetrafluoroborates as a function of added -cyclodextrin at pH = 7.0,  = 0.5 M (KCl).*a,b*

| [CD] (mM) | **7a***b* | **7b***b* | **7c***b* | **7d** | **8a**b | **8b***b* |
| --- | --- | --- | --- | --- | --- | --- |
| 0.00 | 27.4  0.2 | 1.63  0.02 | 9.92  0.05 | 1.04  0.01 | 4.22  0.04 | 1.49  0.02 |
| 0.45 | 27.3  0.2 | 1.63  0.01 | 9.91  0.03 | 1.05  0.01 | 4.22  0.01 | 1.49  0.01 |
| 0.90 | 27.4  0.2 | 1.62  0.02 | 9.97  0.07 | 1.05  0.01 | 4.22  0.06 | 1.50  0.02 |
| 1.50 | 27.5  0.1 | 1.63  0.01 | 10.00  0.03 | 1.06  0.01 | 4.22  0.01 | 1.51  0.01 |
| 2.25 | 27.5  0.2 | 1.62  0.01 | 10.10  0.04 | 1.06  0.01 | 4.25  0.02 | 1.50  0.01 |
| 3.75 | 27.5  0.1 | 1.63  0.01 | 10.10  0.02 | 1.05  0.01 | 4.28  0.01 | 1.51  0.01 |
| 5.25 | 27.7  0.1 | 1.64  0.01 | 10.06  0.04 | 1.06  0.01 | 4.24  0.06 | 1.53  0.01 |
| 7.50 | 27.9  0.1 | 1.65  0.01 | 10.04  0.04 | 1.06  0.01 | 4.30  0.02 | 1.52  0.01 |
| 11.25 | 28.3  0.02 | 1.66  0.01 | 10.04  0.07 | 1.06  0.01 | 4.34  0.02 | 1.52  0.02 |
| 14.70 | 28.5  0.3 | 1.67  0.01 | 10.11  0.02 | 1.08  0.01 | 4.40  0.02 | 1.52  0.01 |

*a* Phosphate buffer; [buffer]total = 10.0 mM.

*b* Mean value of three runs; quoted error = n-1.

***Table S11:*** *Observed rate constants (104  kobs s–1) for the hydrolysis of (2-deoxyglucopyranosyl)pyridinium tetrafluoroborates as a function of added -cyclodextrin at pH = 7.0,  = 0.5 M (KCl).*a,b

| [CD] (mM) | **7a** | **7b***c* | **7b***d* | **7b***e* | **7d** |
| --- | --- | --- | --- | --- | --- |
| 0.00 | 27.2  0.1 | 0.361  0.003 | 1.62  0.01 | 5.98  0.04 | 1.05  0.01 |
| 0.45 | 27.7  0.1 | 0.376  0.005 | 1.65  0.01 | 6.10  0.06 | 1.07  0.01 |
| 0.90 | 27.9  0.1 | 0.381  0.014 | 1.68  0.01 | 6.14  0.06 | 1.07  0.01 |
| 1.50 | 28.5  0.1 | 0.397  0.008 | 1.71  0.06 | 6.33  0.07 | 1.10  0.01 |
| 2.25 | 28.8  0.2 | 0.396  0.010 | 1.75  0.01 | 6.43  0.02 | 1.12  0.01 |
| 3.75 | 30.0  0.2 | 0.425  0.016 | 1.83  0.01 | 6.66  0.08 | 1.16  0.01 |
| 5.25 | 30.9  0.2 | 0.444  0.011 | 1.90  0.02 | 6.75  0.06 | 1.18  0.02 |
| 7.50 | 32.9  0.1 | 0.481  0.014 | 2.01  0.01 | 7.24  0.05 | 1.25  0.01 |
| 11.25 | 35.3  0.3 | 0.567  0.015 | 2.18  0.02 | 7.76  0.06 | 1.33  0.02 |
| 14.70 | 37.7  0.2 | 0.587  0.014 | 2.36  0.01 | 8.33  0.04 | 1.42  0.01 |

**Table S11 continued**.

| [CD] (mM) | **7c*f*** | **7c***g* | **7c***h* | **8a** | **8b***i* |
| --- | --- | --- | --- | --- | --- |
| 0.00 | 1.953  0.002 | 9.95  0.06 | 33.3  0.6 | 4.20  0.04 | 1.50  0.01 |
| 0.45 | 1.961  0.002 | 10.02  0.02 | 33.6  0.2 | 4.26  0.01 | 1.53  0.01 |
| 0.90 | 1.978  0.005 | 10.02  0.04 | 33.4  0.2 | 4.33  0.04 | 1.53  0.02 |
| 1.50 | 1.995  0.004 | 10.08  0.04 | 33.7  0.2 | 4.39  0.01 | 1.57  0.01 |
| 2.25 | 1.976  0.005 | 10.11  0.04 | 33.8  0.2 | 4.45  0.02 | 1.59  0.01 |
| 3.75 | 2.024  0.002 | 10.27  0.03 | 34.5  0.3 | 4.64  0.01 | 1.65  0.01 |
| 5.25 | 2.054  0.006 | 10.34  0.05 | 33.9  0.4 | 4.77  0.06 | 1.72  0.05 |
| 7.50 | 2.096  0.003 | 10.54  0.04 | 34.9  0.2 | 5.04  0.01 | 1.79  0.02 |
| 11.25 | 2.242  0.004 | 10.89  0.06 | 35.7  0.3 | 5.42  0.03 | 1.96  0.01 |
| 14.70 | 2.301  0.002 | 11.15  0.09 | 36.3  0.4 | 5.79  0.02 | 2.10  0.01 |

*a* Phosphate buffer; [buffer]total = 10.0 mM.

*b* Mean value of three runs; quoted error = n-1.

*c* Temperature = 65.0 C.

*d* Temperature = 75.0 C.

*e* Temperature = 85.0 C.

*f* Temperature = 35.0 C.

*g* Temperature = 45.0 C.

*h* Temperature = 55.0 C.

*i* Temperature = 90.0 C.

**Table S12:** Observed rate constants for the hydrolysis of 2-deoxy--D-glucosyl 4′-bromoisoquinolinium tetrafluoroborate (**7a**) as a function of added -CD acid at pH = 7.0a, T = 65 C,  = 0.5 M (KCl).

| [CD] (mM) | 104  kobs (s–1)b |
| --- | --- |
| 0.00 | 26.9  0.5 |
| 0.45 | 27.2  0.7 |
| 0.90 | 27.5  0.1 |
| 1.50 | 27.6  0.1 |
| 2.25 | 28.2  0.6 |
| 3.75 | 29.2  0.2 |
| 5.25 | 30.4  0.2 |
| 7.50 | 32.2  0.4 |
| 11.25 | 34.9  0.2 |
| 14.70 | 37.5  0.3 |

*a* Phosphate buffer; [buffer]total = 10.0 mM.

*b* Mean value of three runs; quoted error = n-1.

***Table S13:*** *Observed rate constants (104  kobs s–1) for the hydrolysis of (2-deoxyglucopyranosyl)pyridinium tetrafluoroborates as a function of added -cyclodextrin at pH = 7.0,  = 0.5 M (KCl).*a,b

| [CD] (mM) | 7bb  (75C) | 7cb (45C) |
| --- | --- | --- |
| 0.00 | NDc | 8.84  0.02 |
| 0.45 | 1.58  0.02 | 8.95  0.01 |
| 0.90 | NDc | 8.86  0.02 |
| 1.50 | NDc | NDc |
| 2.25 | 1.59  0.01 | 8.88  0.03 |
| 3.75 | 1.60  0.02 | 8.99  0.02 |
| 5.25 | 1.60  0.01 | 9.04  0.05 |
| 7.50 | 1.62  0.03 | 9.06  0.01 |
| 11.25 | 1.64  0.02 | 9.07  0.02 |
| 14.70 | 1.69  0.02 | 9.14  0.03 |

*a* Phosphate buffer; [buffer]total = 10.0 mM.

*b* Mean value of three runs; quoted error = n-1.

*c*ND: not determined.

1.  To whom correspondence should be addressed. Tel (604)–291–3532

   FAX (604)–291–3765, e–mail bennet@sfu.ca. [↑](#footnote-ref-2)
